# Supplementary material for: Adapting the Healthy Eating Index 2010 for the Canadian Population: Evidence from the Canadian Community Health Survey
Source: Nutrients. 2017 Aug 21;9(8):910. doi: 10.3390/nu9080910 (PMC5579703; doi:10.3390/nu9080910)
Supplement: Supplementary file 1 [file nutrients-09-00910-s001.docx]

Supplementary Materials: Adapting the Healthy Eating Index 2010 for the Canadian population: evidence from the Canadian Community Health Survey

Mahsa Jessri, Alena Praneet Ng and Mary R. L’Abbé

**Table S1.** Scoring criteria for the Healthy Eating Index-2010 (HEI-2010)1

| **Component** | **Max pts** | **Standard for max score** | **Standard for min score (0)** |
| --- | --- | --- | --- |
| Adequacy Sub-score | 60 |  |  |
| Total fruit | 5 | ≥ 0.8 cup eq./1000kcal | No servings |
| Whole fruit | 5 | ≥ 0.4 cup eq./1000kcal | No servings |
| Total vegetables | 5 | ≥ 1.1 cup eq./1000kcal | No servings |
| Greens and beans | 5 | ≥ 0.2 cup eq./1000kcal | No servings |
| Whole grains | 10 | ≥ 1.5 oz eq./1000kcal | No servings |
| Dairy | 10 | ≥ 1.3 cup eq./1000kcal | No servings |
| Total protein foods | 5 | ≥ 2.5 oz eq./1000kcal | No servings |
| Seafood and plant proteins | 5 | ≥ 0.8 oz eq./1000kcal | No servings |
| Fatty acids | 10 | (PUFA + MUFA)/SFA ≥ 2.5 | (PUFA + MUFA)/SFA ≤ 1.2 |
| Moderation Sub-score | 40 |  |  |
| Refined grains | 10 | ≤ 1.8 oz eq./1000kcal | ≥ 4.3 oz eq./1000kcal |
| Sodium | 10 | ≤ 1.1 g/1000kcal | ≥ 2.0 g/1000kcal |
| Empty calories | 20 | ≤ 19% of energy | ≥ 50% of energy |
| Total HEI-2010 Score | 100 |  |  |

1Specific details for the scoring of each component has been published previously [23].

**Table S2.** Scoring criteria for the Healthy Eating Index-Canada 2010 (HEI-C 2010), a Canadian modification to the HEI-20101,2

| **Component** | **Max pts** | **Standard for max score** | **Standard for min score (0)** |
| --- | --- | --- | --- |
| Adequacy Sub-score | 60 |  | |
| Total fruits and vegetables3 | 10 | 4-10 servings | No servings |
| Whole fruit4, **5** | 5 | 0.84-2.1 servings | No servings |
| Greens and beans5 | 5 | 0.42-1.05 servings | No servings |
| Whole grains6 | 10 | 1.5-4 servings | No servings |
| Dairy | 10 | 2-4 servings | No servings |
| Total protein foods | 5 | 1-3 servings | No servings |
| Seafood and plant proteins7 | 5 | 0.32-0.96 servings | No servings |
| Fatty acids | 10 | (PUFA + MUFA)/SFA ≥ 2.5 | (PUFA + MUFA)/SFA ≤ 1.2 |
| Moderation Sub-score | 40 |  | |
| Refined grains8 | 10 | <50% of grains refined | ≥50% of grains refined |
| Sodium9 | 8 to 10 | AI to UL | 2x UL |
| Empty calories10 | 20 | ≤ 19% of energy | ≥ 50% of energy |
| Total HEI-C 2010 Score | 100 |  | |

1Scoring criteria for the HEI-2010 was converted to servings based on the age and sex-specific recommendations found in CFG 2007. 2Scores between the maximum and minimum were assigned proportionally. 3Includes fruit juice. 4Excludes fruit juice. 5The standard for max scores of the “whole fruit” and “greens and beans” components represent 21% of the “vegetables and fruit” recommendation in CFG. 6The standard for max score of the “whole grains” component is 50% of the “grain products” recommendation in CFG. 7The standard for max score of the “seafood and plant proteins” component represents 32% of the “meat and alternatives” recommendation in CFG. 8The minimum score standard for the refined grains component is ≥50% of grain products consumed as refined grains based on CFG recommendations. 9Respondents scored 10 points if their sodium consumption was at or less than their adequate intake, 8 points if their sodium consumption was at their upper intake level and 0 points if their consumption was twice their upper intake level. 10Includes calories from solid fats, alcohol and added sugars.


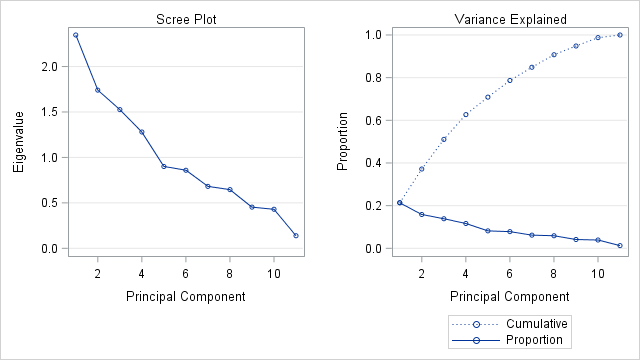


**Figure S1.** Eigenvalues of the correlation matrix and scree plot from weighted principal component analysis of the Healthy Eating Index-Canada 2010 components showing the percentage of explained variance by each of the principal component dimensions among Canadian adults (n = 12,805).

**Table S3.** Eigenvalues of the correlation matrix.

| **Principal Components** | **Eigenvalue** | **Proportion1** | **Cumulative2** |
| --- | --- | --- | --- |
| 1 | 2.34724176 | 0.2134 | 0.2134 |
| 2 | 1.74092820 | 0.1583 | 0.3717 |
| 3 | 1.52589066 | 0.1387 | 0.5104 |
| 4 | 1.27911804 | 0.1163 | 0.6267 |
| 5 | 0.90049230 | 0.0819 | 0.7085 |
| 6 | 0.85929148 | 0.0781 | 0.7866 |
| 7 | 0.68156591 | 0.0620 | 0.8486 |
| 8 | 0.64527780 | 0.0587 | 0.9073 |
| 9 | 0.45263453 | 0.0411 | 0.9484 |
| 10 | 0.42959515 | 0.0391 | 0.9875 |
| 11 | 0.13796416 | 0.0125 | 1.0000 |

1Proportion of the variance in Healthy Eating Index-Canada 2010 scores accounted for by each principal component. 2Cumulative proportion of variance in Healthy Eating Index-Canada 2010 scores accounted for by principal components.
